# Supplementary material for: Separation and complexation of palladium(ii) with a new soft N-donor ligand 6,6′-bis(5,6-dinonyl-1,2,4-triazin-3-yl)-2,2′-bipyridine (C9-BTBP) in nitric acid medium
Source: Royal Society of Chemistry journal article supplement (doi:10.1039/c5nj03082j), 2016-01-01
Supplement: c5nj03082j1.pdf [file c5nj03082j1.pdf]

**Electronic Supplementary Information**

**New Journal of Chemistry(NJ-ART-11-2015-003082)**

**Separation and complexation of palladium (II) with a new soft N-donor ligand 6,6'-bis(5,6-dinonyl-1,2,4-triazin-3-yl)-2,2'-bipyridine (C9-BTBP) in nitric acid medium**

Anyun Zhang<sup>\*</sup>, Lei Xu, Gaoming Lei

College of Chemical and Biological Engineering, Zhejiang University, No.38 Zheda Road, Hangzhou 310027, P. R. China

**Copies of <sup>1</sup>H NMR and ESI-MS Spectra.....S2**

---

<sup>\*</sup> Corresponding author. Anyun Zhang. E-mail: zhangay@zju.edu.cn (A. Zhang)

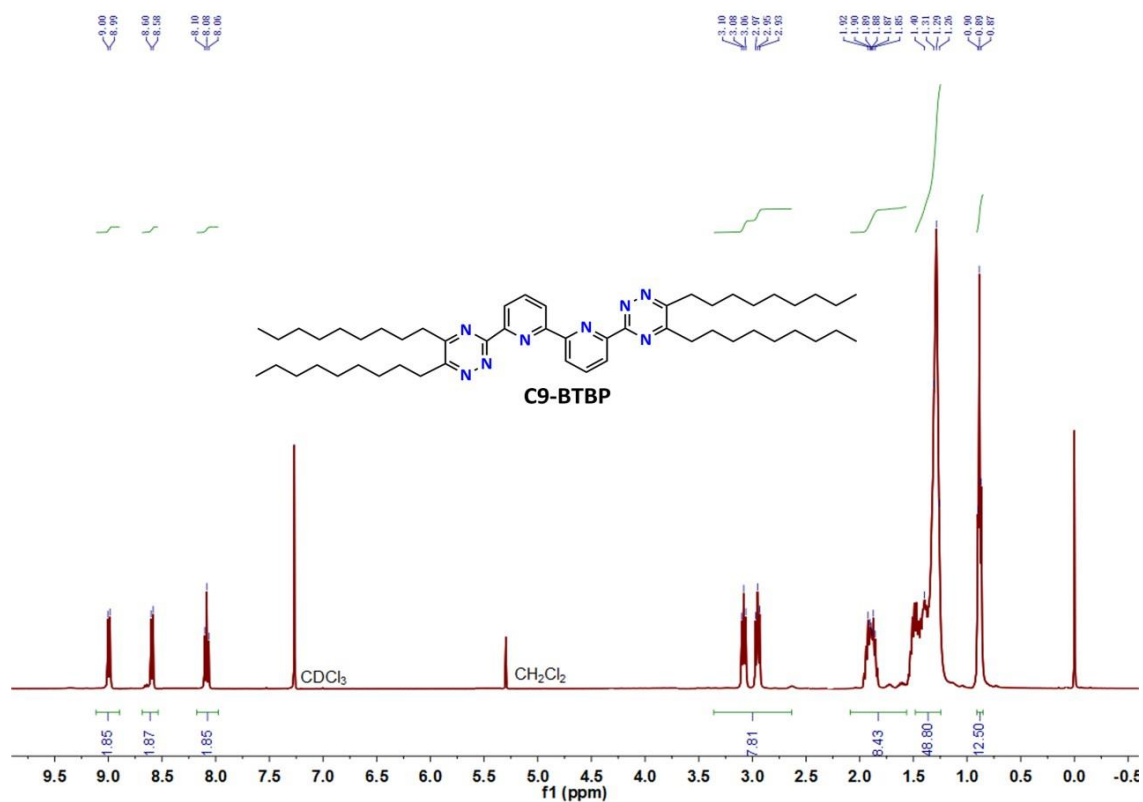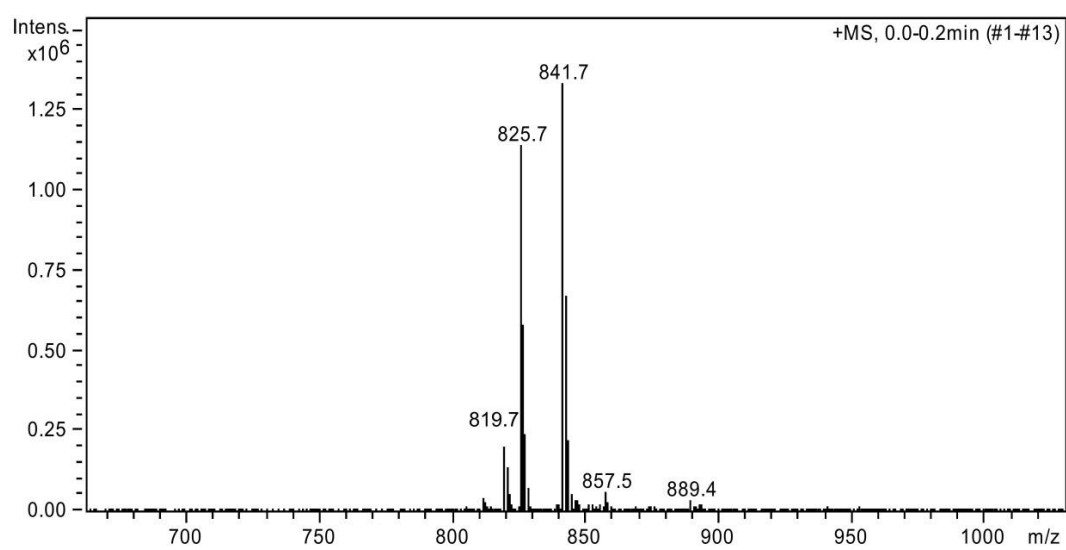

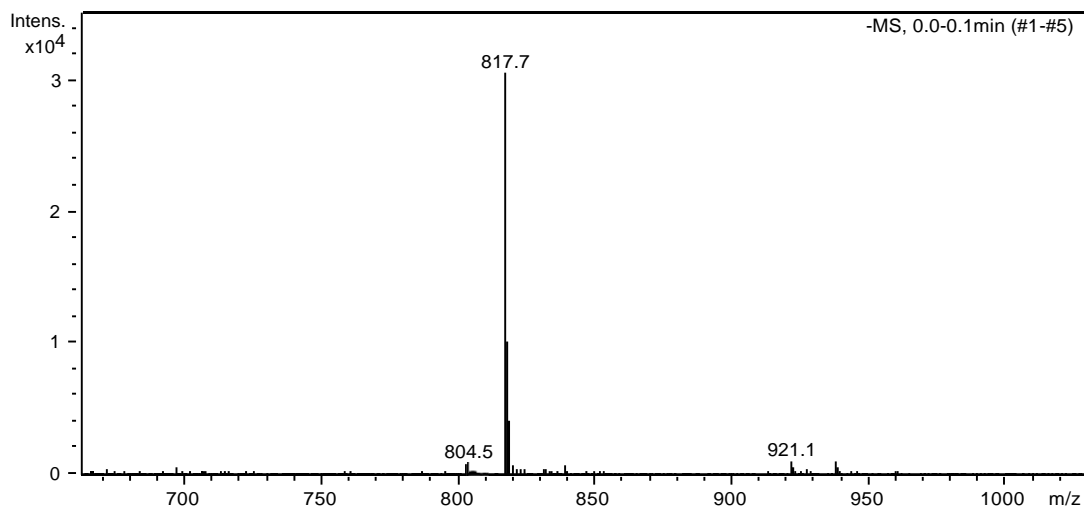

**Fig. S3** The negative ESI-MS spectrum of C9-BTBP in CH<sub>3</sub>OH. Main peak: 817.7 [M-H]<sup>+</sup>.

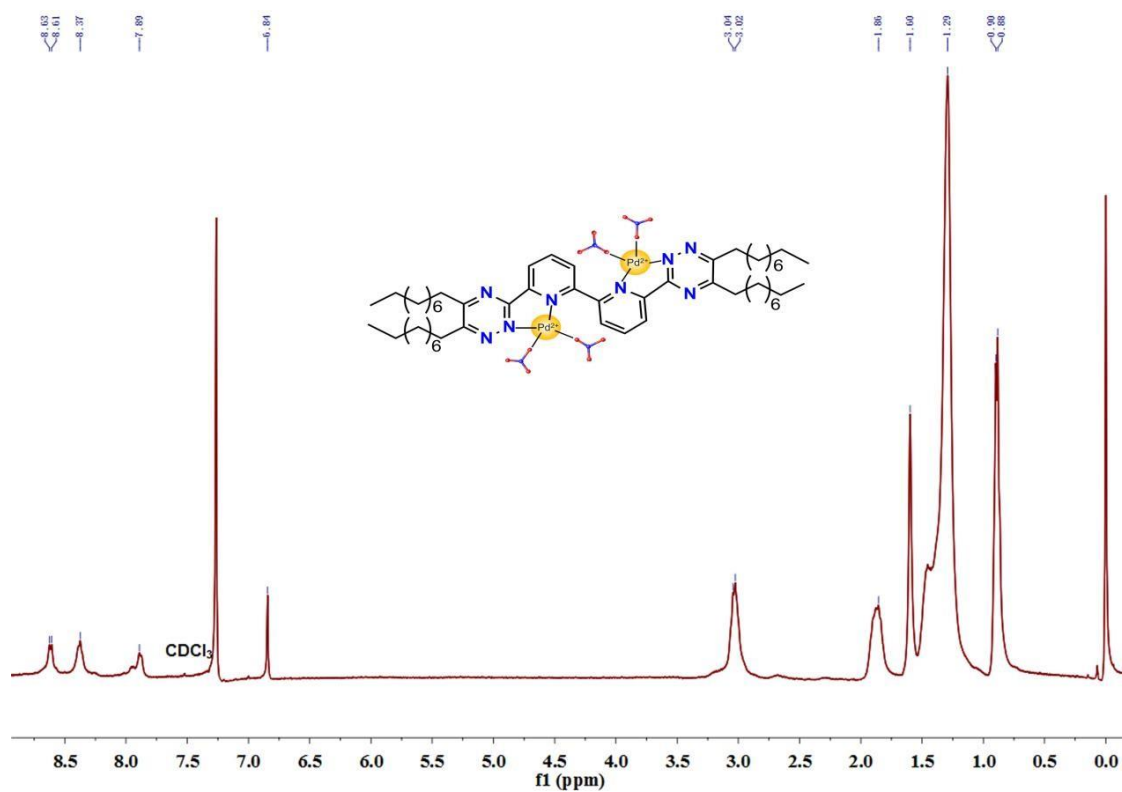

**Fig. S4** The <sup>1</sup>H NMR spectrum (400 MHz, CDCl<sub>3</sub>, 298K) of the binary solid-state complex of Pd(II) with C9-BTBP.

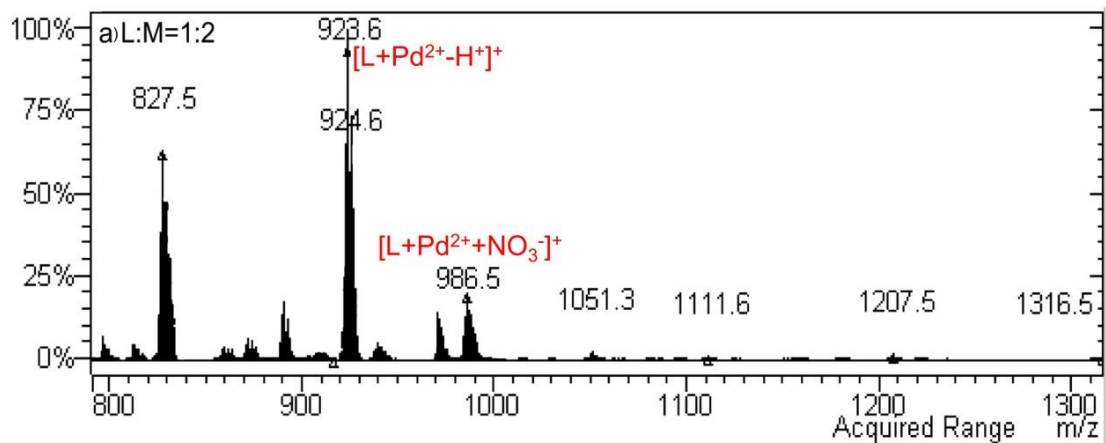

**Fig. S5** The whole positive ESI-MS spectrum of **Fig. 8a**.

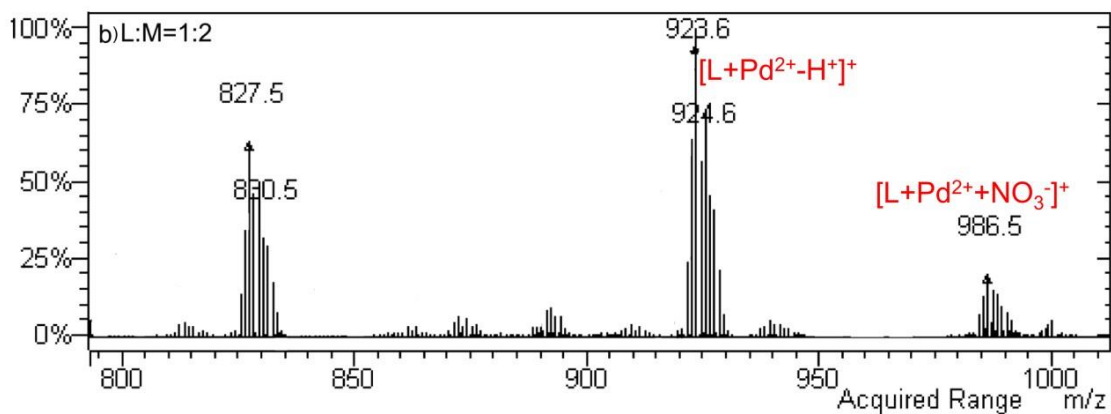

**Fig. S6** The whole positive ESI-MS spectrum of **Fig. 8b**.

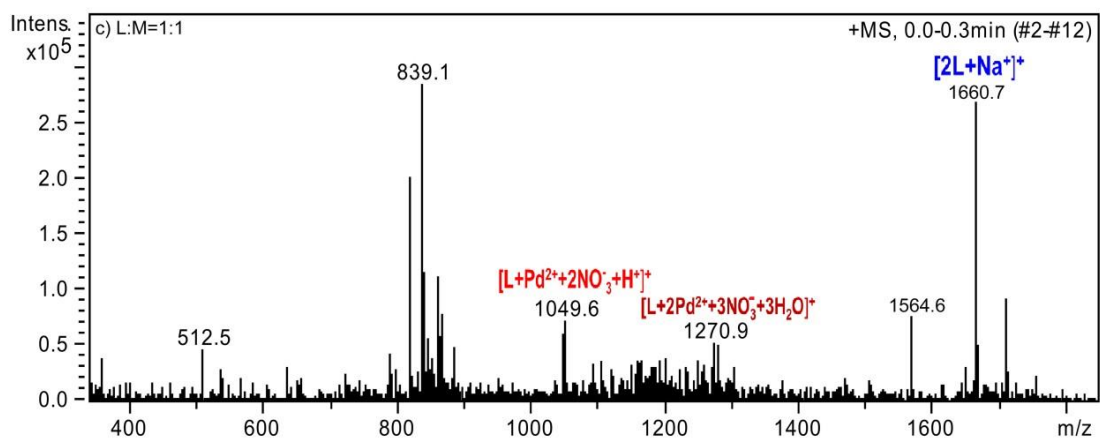

**Fig. S7** The whole positive ESI-MS spectrum of **Fig. 8c**.

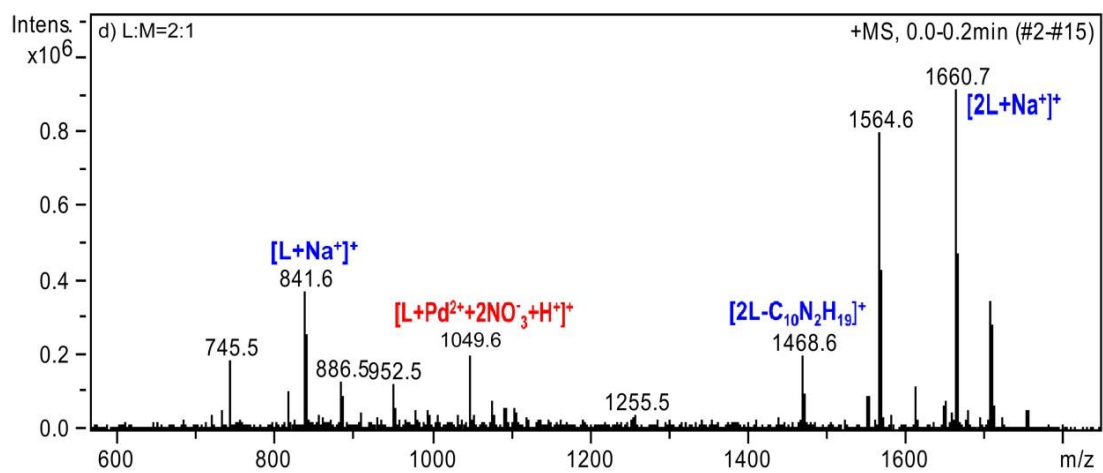

**Fig. S8** The whole positive ESI-MS spectrum of **Fig. 8d**.
